# Supplementary material for: Resistance to simian immunodeficiency virus low dose rectal challenge is associated with higher constitutive TRIM5α expression in PBMC
Source: PubMed Central journal article supplement (PMC4041354; doi:10.1186/1742-4690-11-39), 2014-05-23

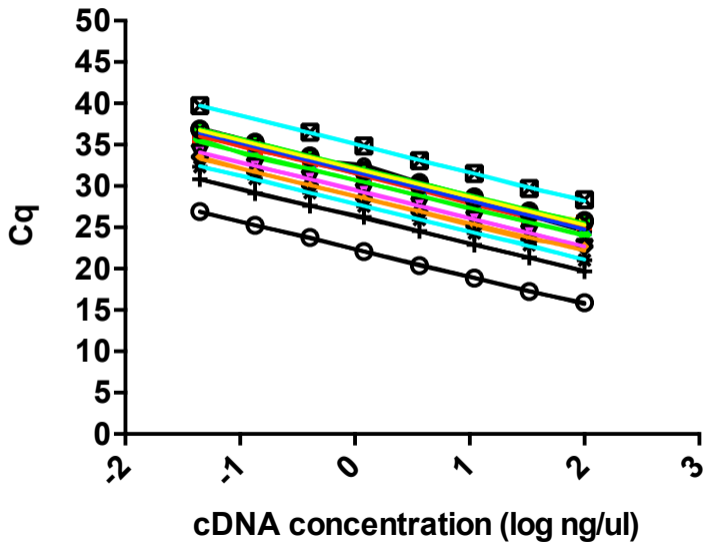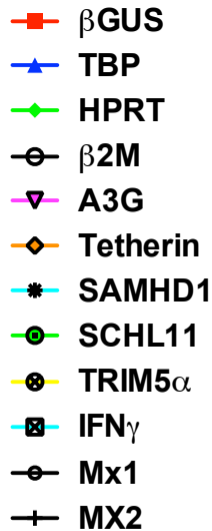

Supplement: 1742-4690-11-39-S3.pdf [file 1742-4690-11-39-S3.pdf]
